# Supplementary material
Source: publisher figshare collection journal article supplement (https://frontiersin.figshare.com/ndownloader/files/31134103)
Supplement: Supplementary file 1 [file 31134103]

**Table S1**. Pressures influencing changes in the state of surface-canopy forming kelp habitats are presented, following the Driver-Activity-Pressure-State-Impact-Response (DAPSIR) framework, commonly used to develop management responses to observed changes in marine ecosystems that address human needs (Oesterwind, Rau, and Zaiko 2016; Elliott et al. 2017; Bryhn et al. 2020). Drivers refer to the social and economic drivers of human needs, which are met through specific human activities that pressure ecosystem state change. This table groups pressures by primary activities known to affect kelp forest ecosystems. The pressures are the mechanisms of state change on the natural systems which then lead to impacts on human welfare and responses through specific management measures (sensu Elliott et al. 2017). We’ve categorized pressures into the spatial and temporal scales that they operate on. We consider changes in the state of kelp habitats as any change in the distribution, abundance and health of canopy-forming kelp, with specific focus on studies from **the Northeast Pacific (bolded references)**.

| ***Activity****: Humans activities related to climate change (e.g. operating oil/gas installations, power stations, industrial/urban emissions)* | | | | |
| --- | --- | --- | --- | --- |
| **Pressure** | **Operating Spatial Scale** | **Operating Temporal Scale** | **State change in kelp forests** | **Reference studies** |
| *Increases in frequency and intensity of marine heatwaves* | *regional to global* | *weeks to months* | High ocean temperatures have been associated with declines in kelp forest distribution and abundance. | [**Tegner & Dayton, 1991; Tegner *et al.*, 1997; Edwards, 2004; Edwards & G. Hernández-Carmona 2005; Edwards and Estes 2006; Arafeh-Dalmau *et al.*, 2019; Starko *et al.*, 2019; Cavanaugh *et al.*, 2019; Rogers-Bennett & Catton, 2019; Beas‐Luna *et al.*, 2020; Sánchez‐Barredo *et al.*, 2020; Berry *et al.*, 2020**](https://www.zotero.org/google-docs/?Mh3kOi); **Schroeder et al. 2020**  **McPherson et al 2021;** **Smith et al 2021**;  [Smale, 2020](https://www.zotero.org/google-docs/?f0gNK0) (Global) |
| *Changes in upwelling patterns* | *local-regional* | *weeks to months* | Strong upwelling brings cool nutrient rich water that promotes growth and reproduction, while lower nutrient availability, in particular nitrate (NO3-), coincides with reduced growth, reproduction, survival, and abundance of kelp.  Upwelling and other climate fluctuations also impact urchin recruitment, which can influence grazing pressure on kelp | [**Wheeler *et al.*, 1984; Zimmerman & Robertson, 1985; Hernández-Carmona *et al.*, 2001; Valdez *et al.*, 2003; Pfister *et al.*, 2018; Hamilton *et al.*, 2020; Berry *et al.*, 2020**](https://www.zotero.org/google-docs/?hM2RmR)**;Okamato et al. 2020**  [Wernberg *et al.*, 2019](https://www.zotero.org/google-docs/?JxZDlE) (Global) |
| *Ocean*  *acidification: changes in pH, pC02 and alkalinity* | *regional-global* | *years to decades* | Variation among macroalgae species based on carbon utilization strategy, but non-calcifying seaweeds generally respond positively to increasing global CO2 concentrations | [Kroeker *et al.*, 2010; Harley *et al.*, 2012](https://www.zotero.org/google-docs/?KEeKNW) (Global); [Olischläger *et al.*, 2012](https://www.zotero.org/google-docs/?5w3bSS) (Germany); [Hepburn *et al.*, 2011](https://www.zotero.org/google-docs/?1iT3ab); [Leal *et al.*, 2017](https://www.zotero.org/google-docs/?EqIC2j); [Roleda *et al.*, 2012](https://www.zotero.org/google-docs/?Q6DjJq) (New Zealand); [Xu *et al.*, 2019](https://www.zotero.org/google-docs/?IL3ONV) (China) |
| *local* | *years to decades* | Kelp forest can act as a refugia to acidification and deoxygenation by locally elevating pH and DO. Kelp forests can also mitigate ocean acidification by increasing seawater pH, oxygen and aragonite saturation state, and decreasing seawater inorganic carbon content and total alkalinity. | [**Frieder *et al.*, 2012; Leary *et al.*, 2017; Pfister *et al.*, 2019**](https://www.zotero.org/google-docs/?IA8XQq) |
| *Salinity change from melting of glaciers, ice caps and ice sheets* | *local-global* | *years to decades* | Lower salinity inhibits kelp growth and survival | [**Druehl, 1970**](https://www.zotero.org/google-docs/?VcZS6m)**;**  [Assis *et al.*, 2018](https://www.zotero.org/google-docs/?6cnJX8) (North Atlantic) |
| *Change in storm severity and wave exposure* | *local-global* | *years to decades* | Increases in the frequency and intensity of storms can lead to breakage and dislodgement of kelp. | [**Dayton & Tegner, 1984; Ebeling et al. 1985; Reed et al., 2011; Krumhansl et al., 2016**](https://www.zotero.org/google-docs/?ARRVcf); **Byrnes et al. 2011** |
| ***Activity****: Construction of in-water structures, replacement of natural substratum, dredging* | | | | |
| **Pressure** | **Operating Spatial Scale** | **Operating Temporal Scale** | **State change in kelp forests** | **Reference studies** |
| *Substratum loss or limitation* | *local* | *days to years* | Physical removal or degradation of hard substrate decreases kelp abundance | [Lawrence, 2014](https://www.zotero.org/google-docs/?4TdX0h);  **Gregr *et al.*, 2019; Schroeder *et al.*, 2020; Torres-Moye & Escofet 2014;**  Fowler-Walker & Connell 2007 |
| *Changes in water motion & flow rates associated with physical change* | *local-regional* | *hours to days* | Kelp nutrient uptake, gas exchange, and reproduction dispersal can decrease without sufficient water motion. Extremely high currents and wave action cause kelp dislodgement and breakage. Changes in flow rate can induce change in kelp morphology | [**Hurd *et al.*, 1996; Denny & Cowen, 1997; Duggins *et al.*, 2001; Koehl *et al.*, 2008; Schroeder *et al.*, 2020; Starko *et al.*, 2019; Berry *et al.*, 2020**](https://www.zotero.org/google-docs/?CTSZy9)**;**  [Hepburn *et al.*, 2007](https://www.zotero.org/google-docs/?sZpI0V) (New Zealand);  [Hurd, 2017](https://www.zotero.org/google-docs/?yFvVPo) (Global) |
| ***Activity****: Coastal development and land use change, including changes in watershed inputs to the ocean* | | | | |
| **Pressure** | **Operating Spatial Scale** | **Operating Temporal Scale** | **State change in kelp forests** | **Reference studies** |
| *Changes in water column sediment concentration, e.g. sediment runoff, dredging* | *local-regional* | *days to weeks* | Increased sediment particles in the water column can lead to lower sporophyte densities, plus physical scouring and reduced recruitment of kelp gametophytes | [**Shaffer & Parks, 199**](https://www.zotero.org/google-docs/?DI5jkh)**4;** [**Dayton *et al.*, 1984**](https://www.zotero.org/google-docs/?cPkeTq) |
| Light limitation from water turbidity and sedimentation reduces kelp growth at gametophyte and young sporophyte phases, potentially inhibiting recruitment | [**Vadas, 1972; Devinny & Volse, 1978; Torres-Moye & Escofet, 2014; Traiger & Konar, 2017; Sánchez‐Barredo *et al.*, 2020**](https://www.zotero.org/google-docs/?5PifWs)**;**  [Lyngby & Mortensen, 1996](https://www.zotero.org/google-docs/?dnL6Mt) (Denmark); [Airoldi & Cinelli, 1997](https://www.zotero.org/google-docs/?lDZOSU) (Italy) |
| *Eutrophication of coastal zone from nutrient runoff* | *local-regional* | *days to weeks* | Increases in epiphyte growth and phytoplankton blooms can lead to decreased kelp health | [Russell *et al.*, 2005](https://www.zotero.org/google-docs/?kREzJX) (Australia) |
| *Pollution and marine wastes* | *local-regional* | *weeks to years* | Exposure to pollutants such as copper and petroleum decreases germling growth rates and gametophyte development | [**Antrim *et al.*, 1995**; Leal *et al.*, 2018](https://www.zotero.org/google-docs/?SPwKl1) (New Zealand) |
| *Point source thermal change, e.g. outflow from power plants* | *local* | *weeks to years* | Increased temperature can cause local dieback of kelp and increase the amount of kelp epiphytes | [**Dixon *et al.*, 1981; Schiel *et al.*, 2004**](https://www.zotero.org/google-docs/?pCsRaw) |
| ***Activity****: Human harvesting of marine mammals, fish, and invertebrates* | | | | |
| **Pressure** | **Operating Spatial Scale** | **Operating Temporal Scale** | **State change in kelp forests** | **Reference studies** |
| *Selective extraction of species* | *local-regional* | *years to decades* | Targeted species loss of predators, such as sea otters, fishes, and invertebrates, cause shifts in grazer behavior or survival and density, increasing grazing rates, which can cause regime shifts from productive kelp forests to urchin barrens. | [**Estes & Palmisano, 1974; Breen et al., 1982; Watson & Estes, 2011; Beas-Luna & Ladah, 2014; Hamilton and Caselle, 2015; Burt et al., 2018; Rogers-Bennett & Catton, 2019**](https://www.zotero.org/google-docs/?B4gBek)**; Smith et al 2021; McPherson et al 2021.** |
| *Bottom trawling bycatch* | *local-regional* | *weeks to years* | Direct removal of kelp and indirect smothering from increased sediment | [Žuljević *et al.*, 2016](https://www.zotero.org/google-docs/?n1JzSE)  (Adriatic Sea);  [Christie et al., 1998](https://www.zotero.org/google-docs/?Td4XS0) (Norway) |
| ***Activity****: Human activities/climate change leading to movement of species beyond their natural ranges or collapse within their range* | | | | |
| **Pressure** | **Operating Spatial Scale** | **Operating Temporal Scale** | **State change in kelp forests** | **Reference studies** |
| *Introduction of non-indigenous species and translocations* | *regional* | *years to decades* | Competition for space from invasive macroalgae & shading by invasive epiphytes and epifauna (e.g. bryozoans) can cause declines in kelp abundance | [**(Cogdell & Thornber, 2008**](https://www.zotero.org/google-docs/?ivEzs8)**, *Undaria pinnatifida*);** [**Sullaway & Edwards, 2020**](https://www.zotero.org/google-docs/?W3SW6w)**, (*Sargassum honeri*);** [**Dixon *et al.*, 1981b**](https://www.zotero.org/google-docs/?4E5w7V)**, (*Membranipora membranacea*)** [**Ambrose & Nelson, 1982**](https://www.zotero.org/google-docs/?HeRcpo)**, *Sargassum muticum*)** |
| *Sea star wasting disease* | *local-regional* | *years* | Removal of sea stars from kelp food webs can augment urchin grazing of kelps (i.e. *Pycnopodia* sea stars are urchin predators) | [**Harold & Pearse, 1987; Schultz *et al.*, 2016; Burt *et al.*, 2018; Rogers-Bennett & Catton, 2019**](https://www.zotero.org/google-docs/?F3RJGO) |
| *Urchin diseases (local-regional)* | *local-regional* | *years* | Removal of sea urchins decreases grazing pressure on kelp, and increases kelp abundance and distribution | [**Pearse & Hines, 1979**](https://www.zotero.org/google-docs/?aS7RuY)**;**  [Feehan & Scheibling, 2014](https://www.zotero.org/google-docs/?ARxzty) (Global) |
| ***Activity****: Kelp harvesting, fishing and aquaculture* | | | | |
| **Pressure** | **Operating Spatial Scale** | **Operating Temporal Scale** | **State change in kelp forests** | **Reference studies** |
| *Removal of kelp biomass from natural populations* | *local* | *weeks to years* | Harvest of *Macrocystis* canopy appears to have minimal effects on survival, biomass, and growth, although repeated removals may lead to reduced holdfast growth.  Complete harvest of kelp can limit recolonization and reduces ecosystem services provided by kelp | [**Coon & Roland, 1980; Krumhansl *et al.*, 2017**](https://www.zotero.org/google-docs/?TybaXG)**;** [Lorentsen *et al.*, 2010](https://www.zotero.org/google-docs/?qG8ybe) (Norway);  [Messieh *et al.*, 1991](https://www.zotero.org/google-docs/?LzPh2c) (Eastern Canada) |


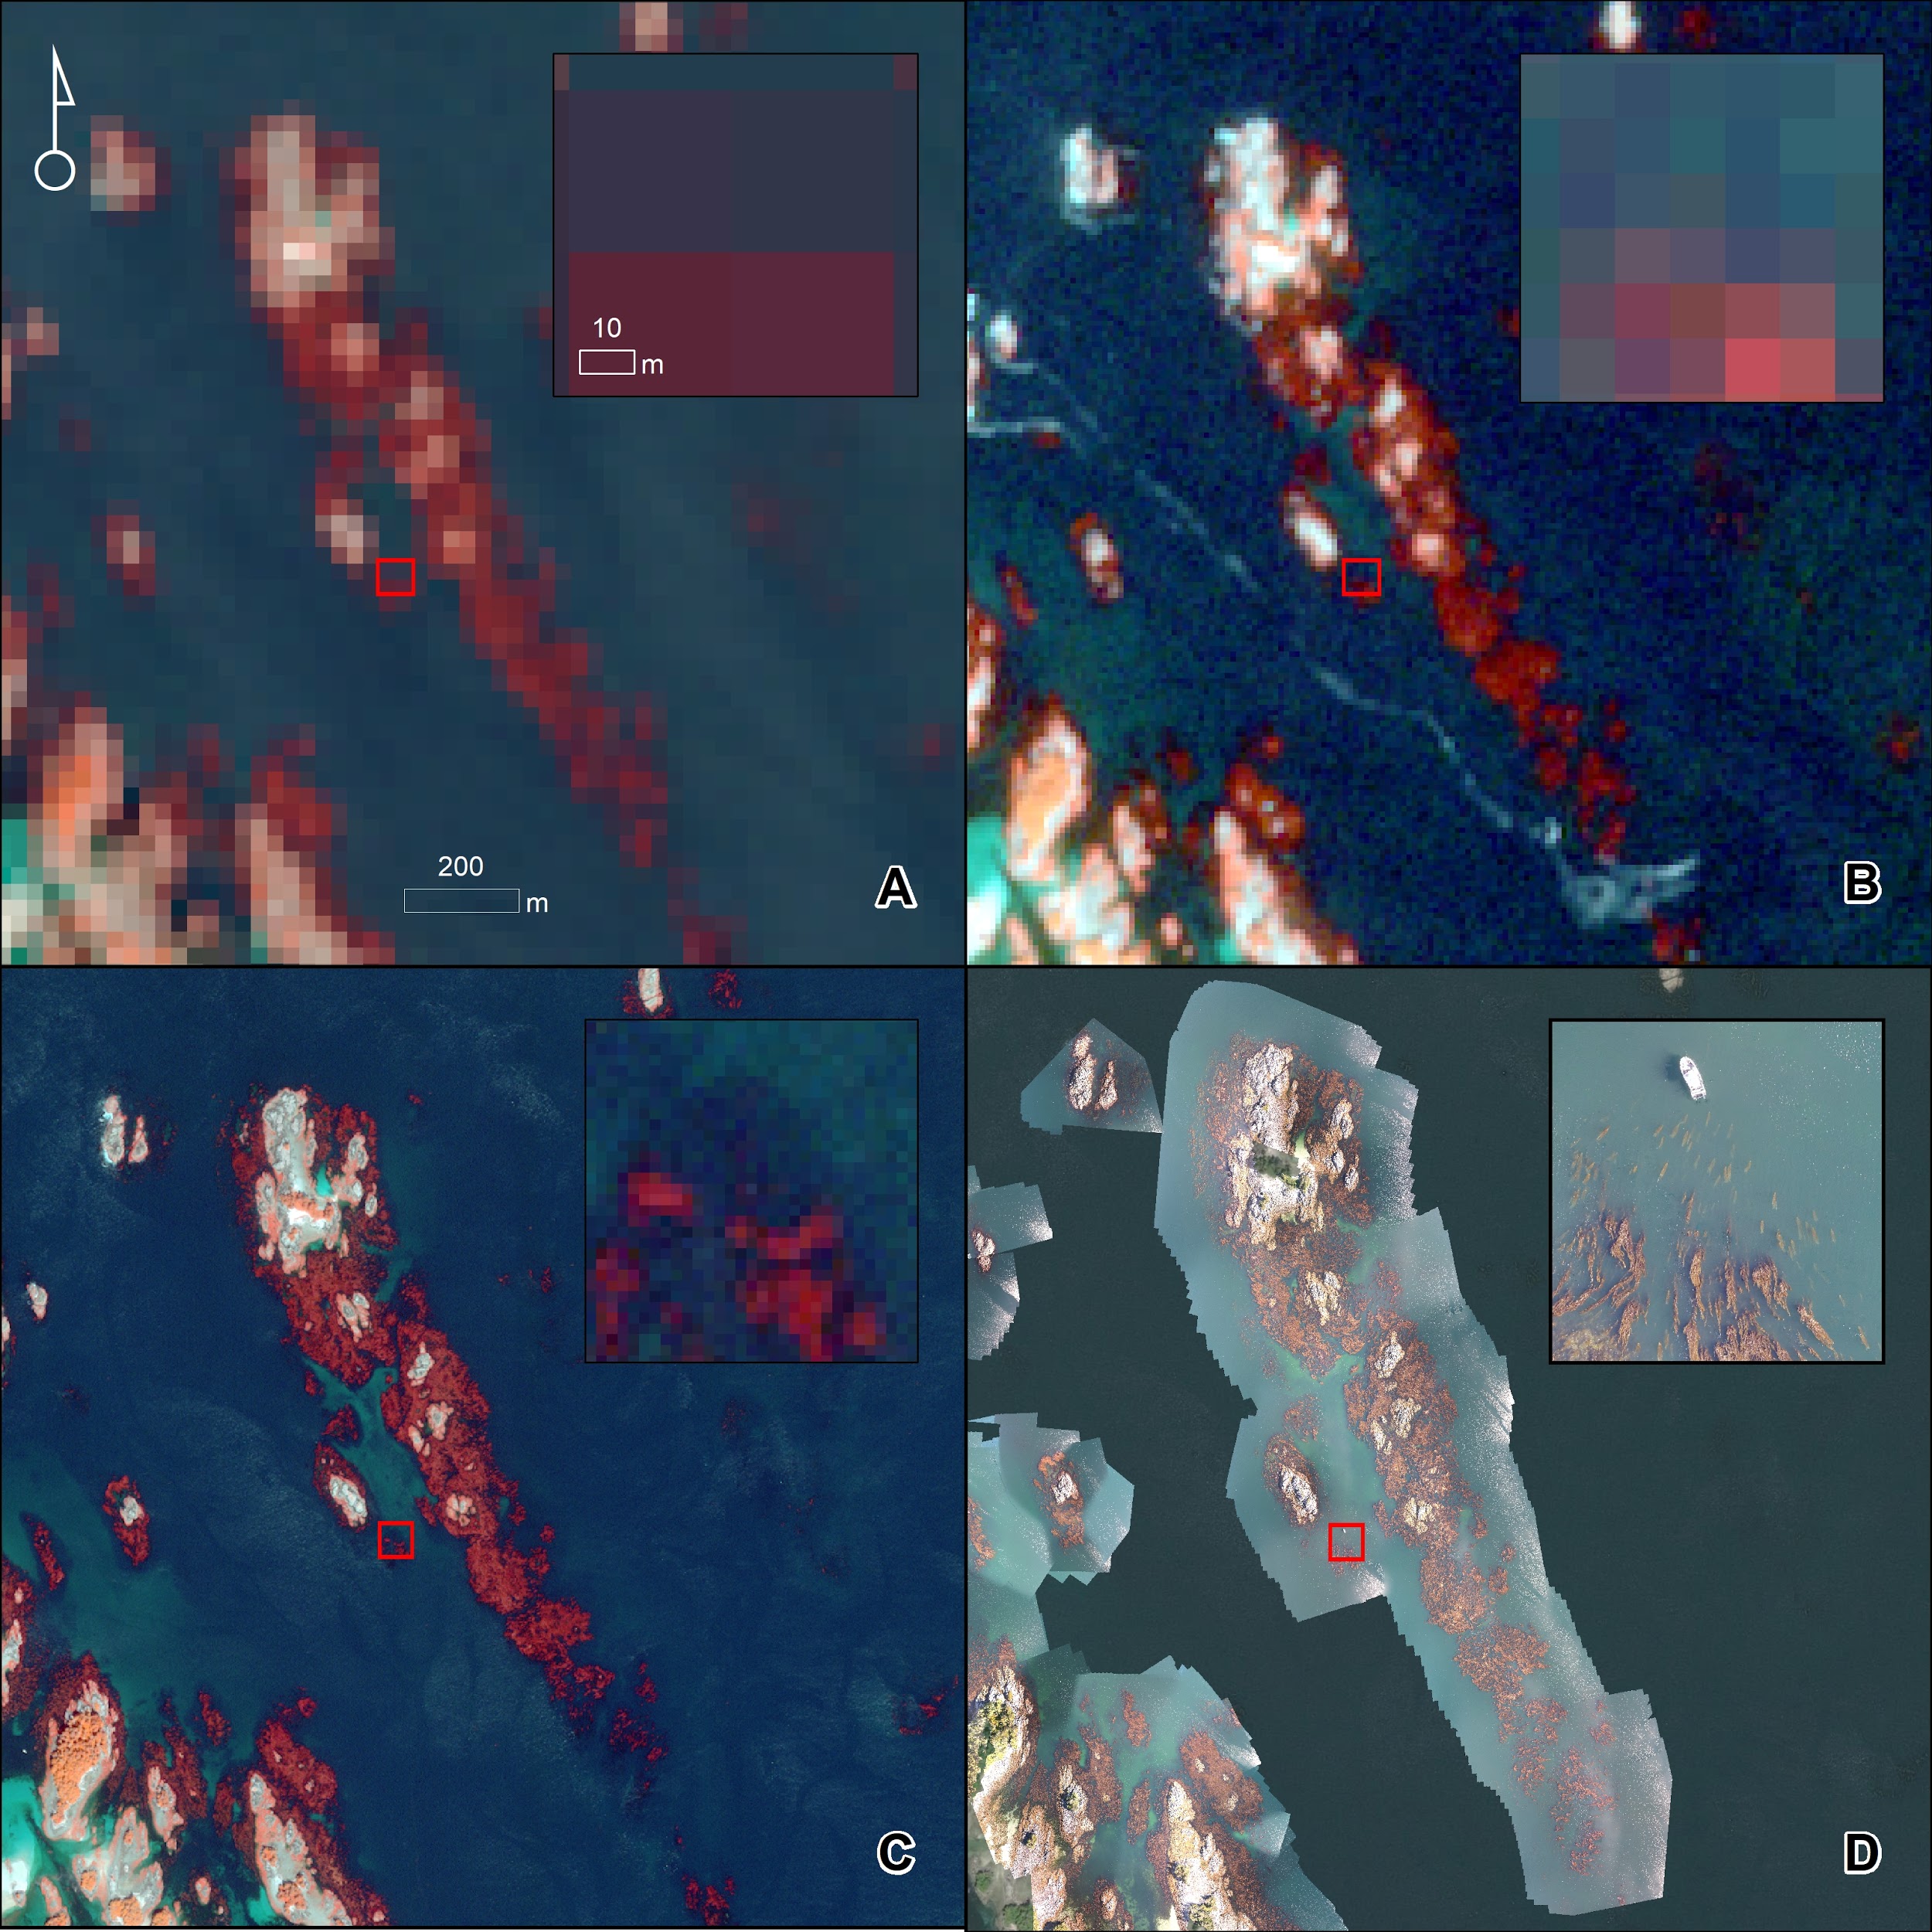


**Figure S1**. False color images (near-infrared displayed as red) of a kelp forest off the coast of British Colombia: (A) Landsat 30 m, (B) Sentinel 2 (10 m), (C) WordView-2 (2 m), (D) RGB UAS (0.035 m).

**Figure S2**. Examples of the impacts of coastal shadowing and adjacency effects. Multispectral (1.84 m) false-color infrared WorldView-2 imagery acquired at different sun elevations depicting some of the factors described in Table 1. (A) Overview of transect locations marked in white boxes. (B) Imagery acquired at a sun elevation of ~58o resulting in no shadow with (E) Transect 1 showing a normal kelp signal with high near infrared reflectance, and relative lower red and green reflectance. (C) Imagery acquired at a sun elevation of ~45o resulting in shadow with (F) Transect 2 showing the dampening of the kelp reflectance signal of pixels adjacent to the shore. (D) Imagery acquired at a sun elevation of ~58o resulting in the adjacency effect where (G) Transect 3 shows the increased reflectance signal from water as a result of contribution of high light scattering from land vegetation to the adjacent water pixels, resulting in possible misclassification of water as kelp. For (E-F) transect pixels are ordered from coastline to offshore

**References**

[Airoldi L, Cinelli F. 1997. Effects of sedimentation on subtidal macroalgal assemblages: an experimental study from a mediterranean rocky shore. *Journal of Experimental Marine Biology and Ecology* 215: 269–288.](https://www.zotero.org/google-docs/?nyIRDy)

[Ambrose RF, Nelson BV. 1982. Inhibition of Giant Kelp Recruitment by an Introduced Brown Alga. *Botanica Marina* 25.](https://www.zotero.org/google-docs/?nyIRDy)

[Antrim LD, Thom RM, Gardiner WW, Cullinan VI, Shreffler DK, Bienert RW. 1995. Effects of petroleum products on bull kelp (Nereocystis luetkeana). *Marine Biology* 122: 23–31.](https://www.zotero.org/google-docs/?nyIRDy)

[Arafeh-Dalmau N, Montaño-Moctezuma G, Martínez JA, Beas-Luna R, Schoeman DS, Torres-Moye G. 2019. Extreme Marine Heatwaves Alter Kelp Forest Community Near Its Equatorward Distribution Limit. *Frontiers in Marine Science* 6.](https://www.zotero.org/google-docs/?nyIRDy)

[Assis J, Araújo MB, Serrão EA. 2018. Projected climate changes threaten ancient refugia of kelp forests in the North Atlantic. *Global Change Biology* 24: e55–e66.](https://www.zotero.org/google-docs/?nyIRDy)

[Beas‐Luna R, Micheli F, Woodson CB, Carr M, Malone D, Torre J, Boch C, Caselle JE, Edwards M, Freiwald J, *et al.*2020. Geographic variation in responses of kelp forest communities of the California Current to recent climatic changes. *Global Change Biology* 00: 1–17.](https://www.zotero.org/google-docs/?nyIRDy)

[Berry HD, Mumford TF, Christiaen B, Dowty P, Calloway M, Ferrier L, Grossman EE, VanArendonk NR. 2020. Long-term changes in kelp forests in an inner basin of the Salish Sea. *bioRxiv*: 2020.02.13.947309.](https://www.zotero.org/google-docs/?nyIRDy)

Bryhn, A. *et al.* (2020) ‘A Model for Disentangling Dependencies and Impacts among Human Activities and Marine Ecosystem Services’, *Environmental Management*. Springer, 65(5), pp. 575–586. doi: 10.1007/s00267-020-01260-1.

[Burt JM, Tinker MT, Okamoto DK, Demes KW, Holmes K, Salomon AK. 2018. Sudden collapse of a mesopredator reveals its complementary role in mediating rocky reef regime shifts. *Proceedings of the Royal Society B: Biological Sciences* 285: 20180553.](https://www.zotero.org/google-docs/?nyIRDy)

[Cavanaugh KC, Reed DC, Bell TW, Castorani MCN, Beas-Luna R. 2019. Spatial Variability in the Resistance and Resilience of Giant Kelp in Southern and Baja California to a Multiyear Heatwave. *Frontiers in Marine Science* 6: 413.](https://www.zotero.org/google-docs/?nyIRDy)

[Cogdell RJ, Thornber JP. 2008. The Preparation and Characterization of Different Types of Light–Harvesting Pigmentprotein Complexes from Some Purple Bacteria. In: Ciba Foundation Symposium 61 - Chlorophyll Organization and Energy Transfer in Photosynthesis. John Wiley & Sons, Ltd, 61–79.](https://www.zotero.org/google-docs/?nyIRDy)

[Coon LM, Roland WG. 1980. *Harvesting Impacts on Macrocystis integrifolia: A Prelimnary Study*. Ministry of Environment Province of British Columbia.](https://www.zotero.org/google-docs/?nyIRDy)

[Dayton PK, Currie V, Gerrodette T, Keller BD, Rosenthal R, Tresca DV. 1984. Patch Dynamics and Stability of Some California Kelp Communities. *Ecological Monographs* 54: 254–289.](https://www.zotero.org/google-docs/?nyIRDy)

[Denny M, Cowen B. 1997. Flow and flexibility. II. The roles of size and shape in determining wave forces on the bull kelp nereocystis luetkeana. *Journal of Experimental Biology* 200: 3165–3183.](https://www.zotero.org/google-docs/?nyIRDy)

[Devinny JS, Volse LA. 1978. Effects of sediments on the development of Macrocystis pyrifera gametophytes. *Marine Biology* 48: 343–348.](https://www.zotero.org/google-docs/?nyIRDy)

[Dixon J, Schroeter SC, Kastendiek J. 1981a. Effects of the Encrusting Bryozoan, Membranipora Membranacea, on the Loss of Blades and Fronds by the Giant Kelp, Macrocystis Pyrifera (laminariales)1. *Journal of Phycology* 17: 341–345.](https://www.zotero.org/google-docs/?nyIRDy)

[Dixon J, Schroeter SC, Kastendiek J. 1981b. Effects of the Encrusting Bryozoan, Membranipora Membranacea, on the Loss of Blades and Fronds by the Giant Kelp, Macrocystis Pyrifera (laminariales)1. *Journal of Phycology* 17: 341–345.](https://www.zotero.org/google-docs/?nyIRDy)

[Druehl LD. 1970. The pattern of Laminariales distribution in the northeast Pacific. *Phycologia* 9: 237–247.](https://www.zotero.org/google-docs/?nyIRDy)

[Duggins D, Eckman JE, Siddon CE, Klinger T. 2001. Interactive roles of mesograzers and current flow in survival of kelps. *Marine Ecology Progress Series* 223: 143–155.](https://www.zotero.org/google-docs/?nyIRDy)

Ebeling, A. W., D. R. Laur, and R. J. Rowley. 1985. Severe storm disturbances and reversal of community structure in a southern California kelp forest. Marine Biology 84:287– 294.

[Edwards MS. 2004. Estimating scale-dependency in disturbance impacts: El Ni�os and giant kelp forests in the northeast Pacific. *Oecologia* 138: 436–447.](https://www.zotero.org/google-docs/?nyIRDy)

Edwards, M. S., and G. Hernández-Carmona. 2005. Delayed recovery of giant kelp near its southern range limit in the North Pacific following El Niño. Marine Biology 147:273– 279.

Edwards, M. S., and J. A. Estes 2006. Catastrophe, recovery, and range limitation in NE Pacific kelp forests: A large-scale perspective. Marine Ecology Progress Series 320:79– 87.

Elliott, M. *et al.* (2017) ‘“And DPSIR begat DAPSI(W)R(M)!” - A unifying framework for marine environmental management’, *Marine Pollution Bulletin*. Elsevier Ltd, 118(1–2), pp. 27–40. doi: 10.1016/j.marpolbul.2017.03.049.

[Feehan CJ, Scheibling RE. 2014. Effects of sea urchin disease on coastal marine ecosystems. *Marine Biology* 161: 1467–1485.](https://www.zotero.org/google-docs/?nyIRDy)

[Frieder CA, Nam SH, Martz TR, Levin LA. 2012. High temporal and spatial variability of dissolved oxygen and pH in a nearshore California kelp forest. *Biogeosciences* 9: 3917–3930.](https://www.zotero.org/google-docs/?nyIRDy)

Gregr, E.J., Palacios, D.M., Thompson, A. and Chan, K.M., 2019. Why less complexity produces better forecasts: An independent data evaluation of kelp habitat models. *Ecography*, *42*(3), pp.428-443.

Hamilton SL, Caselle JE. 2015 Exploitation and recovery of a sea urchin predator has implications for the resilience of southern California kelp forests. Proc. R. Soc. B 282: 20141817

[Hamilton SL, Bell TW, Watson JR, Grorud‐Colvert KA, Menge BA. 2020. Remote sensing: generation of long-term kelp bed data sets for evaluation of impacts of climatic variation. *Ecology*: e03031.](https://www.zotero.org/google-docs/?nyIRDy)

[Harley CDG, Anderson KM, Demes KW, Jorve JP, Kordas RL, Coyle TA, Graham MH. 2012. Effects of Climate Change on Global Seaweed Communities. *Journal of Phycology* 48: 1064–1078.](https://www.zotero.org/google-docs/?nyIRDy)

[Harold C, Pearse JS. 1987. The ecological role of echinoderms in kelp forests. In: Echinoderm studies 2. CRC Press, 137–233.](https://www.zotero.org/google-docs/?nyIRDy)

[Hepburn CD, Holborow JD, Wing SR, Frew RD, Hurd CL. 2007. Exposure to waves enhances the growth rate and nitrogen status of the giant kelp Macrocystis pyrifera. *Marine Ecology Progress Series* 339: 99–108.](https://www.zotero.org/google-docs/?nyIRDy)

[Hepburn CD, Pritchard DW, Cornwall CE, McLeod RJ, Beardall J, Raven JA, Hurd CL. 2011. Diversity of carbon use strategies in a kelp forest community: implications for a high CO2 ocean. *Global Change Biology* 17: 2488–2497.](https://www.zotero.org/google-docs/?nyIRDy)

[Hernández-Carmona G, Robledo D, Serviere-Zaragoza E. 2001. Effect of Nutrient Availability on Macrocystis pyrifera Recruitment and Survival near Its Southern Limit off Baja California. *Botanica Marina* 44.](https://www.zotero.org/google-docs/?nyIRDy)

[Hurd CL. 2017. Shaken and stirred: the fundamental role of water motion in resource acquisition and seaweed productivity. *Perspectives in Phycology*: 73–81.](https://www.zotero.org/google-docs/?nyIRDy)

[Hurd CL, Harrison PJ, Druehl LD. 1996. Effect of seawater velocity on inorganic nitrogen uptake by morphologically distinct forms of Macrocystis integrifolia from wave-sheltered and exposed sites. *Marine Biology* 126: 205–214.](https://www.zotero.org/google-docs/?nyIRDy)

[Koehl M a. R, Silk WK, Liang H, Mahadevan L. 2008. How kelp produce blade shapes suited to different flow regimes: A new wrinkle. *Integrative and Comparative Biology* 48: 834–851.](https://www.zotero.org/google-docs/?nyIRDy)

[Kroeker KJ, Kordas RL, Crim RN, Singh GG. 2010. Meta-analysis reveals negative yet variable effects of ocean acidification on marine organisms. *Ecology Letters* 13: 1419–1434.](https://www.zotero.org/google-docs/?nyIRDy)

[Krumhansl KA, Bergman JN, Salomon AK. 2017. Assessing the ecosystem-level consequences of a small-scale artisanal kelp fishery within the context of climate-change. *Ecological Applications* 27: 799–813.](https://www.zotero.org/google-docs/?nyIRDy)

[Lawrence K. 2014. *Use of Seafloor Substrate Classification to Estimate Kelp Habitat Suitability Following Elwha Dam Removals*. Friday Harbour Laboratories.](https://www.zotero.org/google-docs/?nyIRDy)

[Leal PP, Hurd CL, Fernández PA, Roleda MY. 2017. Ocean acidification and kelp development: Reduced pH has no negative effects on meiospore germination and gametophyte development of Macrocystis pyrifera and Undaria pinnatifida. *Journal of Phycology* 53: 557–566.](https://www.zotero.org/google-docs/?nyIRDy)

[Leal PP, Hurd CL, Sander SG, Armstrong E, Fernández PA, Suhrhoff TJ, Roleda MY. 2018. Copper pollution exacerbates the effects of ocean acidification and warming on kelp microscopic early life stages. *Scientific Reports* 8: 14763.](https://www.zotero.org/google-docs/?nyIRDy)

[Leary PR, Woodson CB, Squibb ME, Denny MW, Monismith SG, Micheli F. 2017. “Internal tide pools” prolong kelp forest hypoxic events: Internal tide pools. *Limnology and Oceanography* 62: 2864–2878.](https://www.zotero.org/google-docs/?nyIRDy)

[Lorentsen S-H, Sjøtun K, Grémillet D. 2010. Multi-trophic consequences of kelp harvest. *Biological Conservation* 143: 2054–2062.](https://www.zotero.org/google-docs/?nyIRDy)

[Lyngby JE, Mortensen SM. 1996. Effects of Dredging Activities on Growth of Laminaria saccharina. *Marine Ecology* 17: 345–354.](https://www.zotero.org/google-docs/?nyIRDy)

McPherson, M. L. *et al.* (2021) ‘Large-scale shift in the structure of a kelp forest ecosystem co-occurs with an epizootic and marine heatwave’, *Communications Biology*. Nature Research, 4(1), pp. 1–9. doi: 10.1038/s42003-021-01827-6.

[Messieh SN, Rowell TW, Peer DL, Cranford PJ. 1991. The effects of trawling, dredging and ocean dumping on the eastern Canadian continental shelf seabed. 11: 1237–1263.](https://www.zotero.org/google-docs/?nyIRDy)

[Olischläger M, Bartsch I, Gutow L, Wiencke C. 2012. Effects of ocean acidification on different life-cycle stages of the kelp Laminaria hyperborea (Phaeophyceae). *Botanica Marina* 55: 511–525.](https://www.zotero.org/google-docs/?nyIRDy)

Oesterwind, D., Rau, A. and Zaiko, A. (2016) ‘Drivers and pressures - Untangling the terms commonly used in marine science and policy’, *Journal of Environmental Management*. Academic Press, pp. 8–15. doi: 10.1016/j.jenvman.2016.05.058.

Okamoto, D. K., Schroeter, S. C., & Reed, D. C. (2020). Effects of ocean climate on spatiotemporal variation in sea urchin settlement and recruitment. *Limnology and Oceanography*, *65*(9), 2076-2091.

[Pearse JS, Hines AH. 1979. Expansion of a Central California Kelp Forest Following the Mass Mortality of Sea Urchins. *Marine Biology* 51: 83–91.](https://www.zotero.org/google-docs/?nyIRDy)

[Pfister CA, Altabet MA, Weigel BL. 2019. Kelp beds and their local effects on seawater chemistry, productivity, and microbial communities. *Ecology* 100: e02798.](https://www.zotero.org/google-docs/?nyIRDy)

[Pfister CA, Berry HD, Mumford T. 2018. The dynamics of Kelp Forests in the Northeast Pacific Ocean and the relationship with environmental drivers (A Randall Hughes, Ed.). *Journal of Ecology* 106: 1520–1533.](https://www.zotero.org/google-docs/?nyIRDy)

[Rogers-Bennett L, Catton CA. 2019. Marine heat wave and multiple stressors tip bull kelp forest to sea urchin barrens. *Scientific Reports* 9: 15050.](https://www.zotero.org/google-docs/?nyIRDy)

[Roleda MY, Morris JN, McGraw CM, Hurd CL. 2012. Ocean acidification and seaweed reproduction: increased CO2 ameliorates the negative effect of lowered pH on meiospore germination in the giant kelp Macrocystis pyrifera (Laminariales, Phaeophyceae). *Global Change Biology* 18: 854–864.](https://www.zotero.org/google-docs/?nyIRDy)

[Russell BD, Elsdon TS, Gillanders BM, Connell SD. 2005. Nutrients increase epiphyte loads: broad-scale observations and an experimental assessment. *Marine Biology* 147: 551–558.](https://www.zotero.org/google-docs/?nyIRDy)

[Sánchez‐Barredo M, Sandoval‐Gil JM, Zertuche‐González JA, Ladah LB, Belando‐Torrentes MD, Beas‐Luna R, Cabello‐Pasini A. 2020. Effects of Heat Waves and Light Deprivation on Giant Kelp Juveniles (Macrocystis pyrifera, Laminariales, Phaeophyceae). *Journal of Phycology* 56: 880–894.](https://www.zotero.org/google-docs/?nyIRDy)

[Schiel DR, Steinbeck JR, Foster MS. 2004. Ten Years of Induced Ocean Warming Causes Comprehensive Changes in Marine Benthic Communities. *Ecology* 85: 1833–1839.](https://www.zotero.org/google-docs/?nyIRDy)

[Schroeder SB, Boyer L, Juanes F, Costa M. 2020. Spatial and temporal persistence of nearshore kelp beds on the west coast of British Columbia, Canada using satellite remote sensing. *Remote Sensing in Ecology and Conservation*.](https://www.zotero.org/google-docs/?nyIRDy)

[Schultz JA, Cloutier RN, Côté IM. 2016. Evidence for a trophic cascade on rocky reefs following sea star mass mortality in British Columbia. *PeerJ* 4: e1980.](https://www.zotero.org/google-docs/?nyIRDy)

[Shaffer JA, Parks DS. Seasonal variations in and observations of landslide impacts on the algal composition of a Puget Sound nearshore kelp forest.](https://www.zotero.org/google-docs/?nyIRDy)

[Smale DA. 2020. Impacts of ocean warming on kelp forest ecosystems. *New Phytologist* 225: 1447–1454.](https://www.zotero.org/google-docs/?nyIRDy)

Smith, J.G., Tomoleoni, J., Staedler, M., Lyon, S., Fujii, J. and Tinker, M.T., 2021. Behavioral responses across a mosaic of ecosystem states restructure a sea otter–urchin trophic cascade. *Proceedings of the National Academy of Sciences*, *118*(11).

[Starko S, A Bailey L, Creviston E, A James K, Warren A, K Brophyid M, Danasel A, Fass M, A Townsend J, Neufeld C. 2019. Environmental heterogeneity mediates scale- dependent declines in kelp diversity on intertidal rocky shores. *PLoS ONE*.](https://www.zotero.org/google-docs/?nyIRDy)

[Sullaway G, Edwards M. 2020. Impacts of the non-native alga Sargassum horneri on benthic community production in a California kelp forest. *Marine Ecology Progress Series* 637: 45–57.](https://www.zotero.org/google-docs/?nyIRDy)

[Tegner M, Dayton P. 1991. Sea urchins, El Ninos, and the long term stability of Southern California kelp forest communities. *Marine Ecology Progress Series* 77: 49–63.](https://www.zotero.org/google-docs/?nyIRDy)

[Tegner M, Dayton P, Edwards P, Riser K. 1997. Large-scale, low-frequency oceanographic effects on kelp forest succession:a tale of two cohorts. *Marine Ecology Progress Series* 146: 117–134.](https://www.zotero.org/google-docs/?nyIRDy)

[Torres-Moye G, Escofet A. 2014. Land-Sea Interactions in Punta China (Baja California, México): Addressing Anthropic and Natural Disturbances in a Retrospective Context. *Journal of Environmental Protection* 05: 1520.](https://www.zotero.org/google-docs/?nyIRDy)

[Traiger SB, Konar B. 2017. Supply and survival: glacial melt imposes limitations at the kelp microscopic life stage. *Botanica Marina* 60.](https://www.zotero.org/google-docs/?nyIRDy)

[Vadas RL. 1972. Ecological Implications of Culture Studies on Nereocystis Luetkeana1. *Journal of Phycology* 8: 196–203.](https://www.zotero.org/google-docs/?nyIRDy)

[Valdez MC, Zaragoza ES, Belda DL, Marcos R, Ramírez RA. 2003. Effect of climatic change on the harvest of the kelp Macrocystis pyrifera on the Mexican Pacific coast. Bulletin of Marine Science 73: 12.](https://www.zotero.org/google-docs/?nyIRDy)

[Wernberg T, Krumhansl K, Filbee-Dexter K, Pedersen MF. 2019. Status and Trends for the World’s Kelp Forests. In: World Seas: an Environmental Evaluation. Elsevier, 57–78.](https://www.zotero.org/google-docs/?nyIRDy)

[Wheeler WN, Smith RG, Srivastava LM. 1984. Seasonal photosynthetic performance of Nereocystis luetkeana. *Canadian Journal of Botany* 62: 664–670.](https://www.zotero.org/google-docs/?nyIRDy)

[Xu D, Brennan G, Xu L, Zhang XW, Fan X, Han WT, Mock T, McMinn A, Hutchins DA, Ye N. 2019. Ocean acidification increases iodine accumulation in kelp-based coastal food webs. *Global Change Biology* 25: 629–639.](https://www.zotero.org/google-docs/?nyIRDy)

[Zimmerman RC, Robertson DL. 1985. Effects of El Niño on local hydrography and growth of the giant kelp, Macrocystis pyrifera, at Santa Catalina Island, California1. *Limnology and Oceanography* 30: 1298–1302.](https://www.zotero.org/google-docs/?nyIRDy)

[Žuljević A, Peters AF, Nikolić V, Antolić B, Despalatović M, Cvitković I, Isajlović I, Mihanović H, Matijević S, Shewring DM, *et al.*2016. The Mediterranean deep-water kelp Laminaria rodriguezii is an endangered species in the Adriatic Sea. *Marine Biology* 163: 69.](https://www.zotero.org/google-docs/?nyIRDy)
